# Supplementary material for: The reactivity and pathway of Fenton reactions driven by hydroxybenzoic acids: the effect of hydroxylation
Source: Royal Society of Chemistry journal article supplement (doi:10.1039/c9ew00250b), 2019-01-01
Supplement: c9ew00250b1.pdf [file c9ew00250b1.pdf]

Supporting information

**The reactivity and pathway of Fenton reactions  
driven by hydroxybenzoic acids: the effect of  
hydroxylation**

**Daojian Tang<sup>a</sup>, Guishui Zhang<sup>a</sup>, Ya Wang<sup>a</sup>, Fengxia Chen<sup>a,b</sup>, Jiahai Ma<sup>a\*</sup>**

*<sup>a</sup> School of Chemical Sciences, University of Chinese Academy of Sciences, Beijing  
100049, P.R. China*

*<sup>b</sup> Sino Danish Ctr Educ & Res, Beijing, 100049, P.R. China*

\* Corresponding author

E-mail addresses: [majia@ucas.ac.cn](mailto:majia@ucas.ac.cn) (J. Ma).

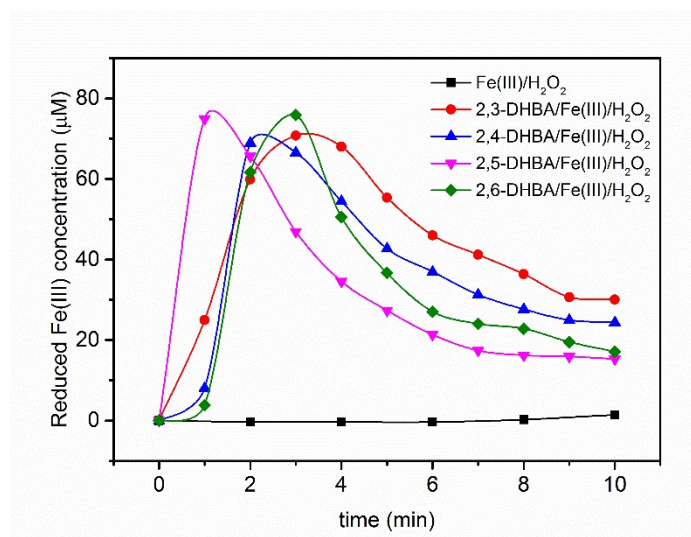

**Fig. S1.** Reduced Fe(III) concentration in the HBAs/Fenton system. The final concentration were HBAs 0.1 mM, FeCl<sub>3</sub> 0.1 mM, H<sub>2</sub>O<sub>2</sub> 1 mM.

### Scheme S1: primary products expected for each HBA

| Compound | structure                                                                                                                           | decarboxylation                                                                                                                 | <i>para</i> -addition OR <i>ortho</i> -addition <sup>a</sup>                                                                             |
|----------|-------------------------------------------------------------------------------------------------------------------------------------|---------------------------------------------------------------------------------------------------------------------------------|------------------------------------------------------------------------------------------------------------------------------------------|
| SA       | 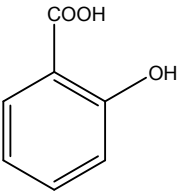<br><chem>O=C(O)c1ccccc1O</chem><br>$m/z=137$      | <br><chem>Oc1ccccc1O</chem><br>$m/z=109$       | <br><chem>O=C(O)c1cc(O)ccc1O</chem><br>$m/z=153$      |
| 2,3-DHBA | <br><chem>O=C(O)c1cc(O)c(O)cc1</chem><br>$m/z=153$ | <br><chem>Oc1cc(O)c(O)cc1</chem><br>$m/z=125$ | <br><chem>O=C(O)c1cc(O)c(O)c(O)c1</chem><br>$m/z=169$ |
| 2,4-DHBA | <br><chem>O=C(O)c1cc(O)ccc1O</chem><br>$m/z=153$ | <br><chem>Oc1cc(O)ccc1O</chem><br>$m/z=125$ | <br><chem>O=C(O)c1cc(O)c(O)cc1</chem><br>$m/z=169$  |
| 2,5-DHBA | <br><chem>O=C(O)c1cc(O)ccc1O</chem><br>$m/z=153$ | <br><chem>Oc1cc(O)ccc1O</chem><br>$m/z=125$ | <br><chem>O=C(O)c1cc(O)c(O)cc1</chem><br>$m/z=169$  |

**2,6-DHBA**

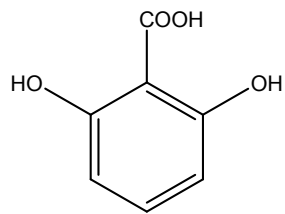

m/z=153

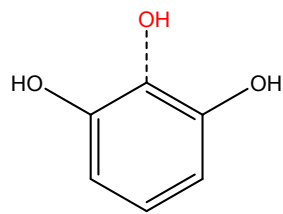

m/z=125

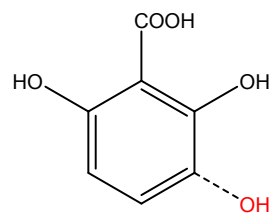

m/z=169

---

<sup>a</sup> -----OH, -----OH, -----OH means the possible addition sites of HO•
